# Supplementary material for: Ixodes scapularis Tick Saliva Proteins Sequentially Secreted Every 24 h during Blood Feeding
Source: PLoS Negl Trop Dis. 2016 Jan 11;10(1):e0004323. doi: 10.1371/journal.pntd.0004323 (PMC4709002; doi:10.1371/journal.pntd.0004323)
Supplement: S2 Table — Two tabs contain the normalized percentage of NSAF for tick and rabbit derived proteins. (XLS) [file pntd.0004323.s002.xls]

## Sheet: Tick
Normalized Percentage of NSAF values.
	Feeding Time Point
Classification	Accession #	24h	48h	72h	96h	120h	BD	SD	NCBI Annotation	Merops Family
Metalloprotease	EEC19963.1	0.1983	0.6053	0.1064	0.673	0.1562	0	0	metalloprotease	M12
	JAA68346.1	0.0948	0.2194	0	0.4059	0.2782	0	0	salivary gland metalloprotease	M12
	JAA73295.1	0.247	0.3509	0	0.4345	0	0	0	metalloprotease	M12
	AAM93652.1	0	0.3618	0.1544	0.6175	0.8574	0	0.0862	metalloprotease	M12
	AAP22067.1	0	0.2349	0.1276	0.4994	0	0	0.0541	metalloprotease	M12
	AAT92201.1	0	0.2047	0	0.4111	0.4305	0	0.0873	metalloprotease	M12
	EEC19964.1	0	0.1555	0	0.3533	0.6001	0	0	metalloprotease	M12
	EEC12993.1	0	0.1752	0	0.3486	0	0	0.0516	metalloprotease	M12
	AAY66737.1	0	0.1533	0	0.2764	0	0	0	angiotensin-I converting enzyme	M2
	EEC15206.1	0	0.3893	0	0.3661	0	0	0.2279	carboxypeptidase Q	M28
	EEC12990.1	0	0.1327	0	0.2319	0.0739	0	0	metalloprotease	M12
	JAA65281.1	0	0.046	0.0649	0.1674	0	0	0	metalloprotease	M12
	JAA68328.1	0	0.0951	0	0	0	0	0	metalloprotease	M12
	AEO35462.1	0	0.0176	0	0	0	0	0	meprin A	M12
	JAA68349.1	0	0	0	0.295	0.2808	0	0.0615	metalloprotease	M12
	EEC12992.1	0	0	0	0.0809	0	0	0	metalloprotease	M12
	JAA65531.1	0	0	0	0.1279	0	0	0	angiotensin converting enzyme	M2
	EEC05706.1	0	0	0	0	0.1537	0.5893	0.0681	aminoacylase	M20
	EEC06447.1	0	0	0	0	0	0	0.0702	CNDP dipeptidase	M20
	JAA70541.1	0	0	0	0	0.0601	0	0	metalloprotease	M12
	JAB78055.1	0	0	0	0	0	0	0.0911	M20 domain-containing peptidase	M20
	JAB80146.1	0	0	0	0	0	0	0.0655	M20 domain-containing peptidase	M20
	EEC05511.1	0	0	0	0	0	0	0.0585	GluZincin superfamily,	M13
	EEC16244.1	0	0	0	0	0	0	0.0494	dipeptidyl peptidase III	M49
	JAB72088.1	0	0	0	0	0	0	0.0281	glutamate carboxypeptidase	M28
	EEC03480.1	0	0	0	0	0	0	0.0322	aminopeptidase	M17
Aspartyl protease	EEC16134.1	0	0	0	0	0.0909	0	0	aspartyl protease	A1
Serine protease	JAB70891.1	0	0.0148	0	0	0	0	0	trypsin-like serine protease	S1
	JAB74946.1	0	0.0858	0	0	0	0	0	trypsin-like serine protease	S1
	EEC04149.1	0	0	0	0.2075	0	0	0	trypsin-like serine protease	S1
Cysteine protease	JAA69411.1	0	0.0799	0	0.0758	0	0	0	cathepsin L-like	C1
	JAA69382.1	0	0.0461	0	0	0	0	0	cathepsin B endopeptidase	C1
	EEC01212.1	0	0	0	0	0	0	0.111	cathepsin B endopeptidase	C1
Kunitz	EEC16686.1	0	0.0581	0	0	0	0	0	serine protease inhibitor	I2
	AAY66540.1	0	0.1065	0	0	0	0	0	cysteine rich secreted protein	I2
Serpin	EEC09656.1	0.9275	0.9245	1.0024	1.0337	1.7401	2.2103	0.5616	serpin 4	I4
	EEC14235.1	0.1201	0.1743	0.1614	0.4642	0.2589	0.7586	0.1626	serpin 2	I4
	EEC19556.1	0.5811	0.4193	0.2262	0.2792	0.2631	0.4735	0.1439	secreted salivary gland peptide	I4
	EEC19558.1	0.3611	0.4022	0.3151	0.437	0.777	0.9854	0.2328	serpin 4	I4
	EEC08061.1	0.19	0.3459	0.4953	0.4298	0	0.6422	0.0515	serpin 2	I4
	JAA72989.1	0.1342	0.1098	0	0.1961	0	0.367	0.0234	serpin 2	I4
	JAA73759.1	0.0614	0.0746	0	0.1171	0	0.3888	0.1633	serpin 1	I4
	JAA71155.1	0	0.451	0.3182	0.3942	0.8222	0	0	serpin 4	I4
	EEC05896.1	0	0.0594	0	0.1295	0	0	0.045	serine protease inhibitor	I4
	JAA72940.1	0	0	0	0.1512	0.2571	0	0.0712	serpin 2	I4
	EEC19559.1	0	0	0	0	0	0	0.0502	serpin 1	I4
TIL	EEC15680.1	3.6371	1.5752	1.4969	1.399	0.4052	6.542	0.9214	secreted cysteine rich protein	I8
	EEC15678.1	3.1865	2.0438	1.6744	0.8745	1.2646	0	0.7058	secreted cysteine rich protein	I8
	EEC15679.1	4.4278	1.5482	1.665	0.8745	0	0	0.6831	secreted cysteine rich protein	I8
	EEC15674.1	0.3522	0.2291	0.1846	0.1985	0	0	0.0838	secreted cysteine rich protein	I8
	JAA66022.1	0.6946	0.0956	0.4891	0	0	0	0	secreted cysteine rich protein	I8
	EEC15677.1	1.3696	0.8885	0	0.0987	0	0	0	secreted protein, putative	I8
	EEC02489.1	0	0.0647	0	0	0	0	0	Inducible metalloproteinase	I8
	EEC20584.1	0	0.0643	0	0	0	0	0	secreted protein, putative	I8
	EEC06487.1	0	0.1251	0	0	0	0	0	secreted cysteine rich protein	I8
	JAA72967.1	0	0.0816	0	0	0	0	0	von Willebrand factor, putative	I8
	JAA72280.1	0	0	0.0859	0	0	0	0	secreted cysteine rich protein	I8
	JAA70915.1	0	0	0	0	0	0	0.3788	secreted cysteine rich protein	I8
	EEC04427.1	0	0	0	0	0	0	0.178	secreted cysteine rich protein	I8
Cystatin	EEC07262.1	2.4868	1.0781	1.6504	0.4414	0.7209	0.7556	0	secreted cystatin	I25
	EEC07264.1	1.5474	0.8847	0.66	0.5714	0	0.6797	0	secreted cystatin	I25
	AAY66685.1	0.8495	0.6083	0.5608	0.6021	0	1.4197	0.4082	secreted cystatin	I25
	JAB78041.1	0.4603	0	0.3849	0	0.3153	1.0426	0	secreted cystatin	I25
Thyropin	JAA67597.1	0.605	0.2622	1.4054	0.3744	0.277	1.976	0.1682	thyropin	I31
	JAA67758.1	0	0	0.9656	0	0	0	0	thyropin	I31
α-2-macroglobulin	ACJ26770.1	0.3406	0.5576	0.3171	0.6995	0.2861	0.6689	0.3353	alpha-2-macroglobulin	I39
	JAB70612.1	0.0712	0.1548	0.0379	0.1526	0	0	0.0597	alpha-2-macroglobulin	I39
	EEC10094.1	0.5795	0.5216	0	0.5702	0.2906	1.2725	0.2164	alpha-2-macroglobulin	I39
	EEC20000.1	0.3788	0.5387	0	0.6888	0	0	0.3224	alpha-2-macroglobulin	I39
	EEC10096.1	0.2616	0.2801	0.089	0.3703	0.1213	0	0.1579	alpha-2-macroglobulin	I39
	AAM93645.1	0	0.76	0	0.8311	0	0	0.4889	alpha-2-macroglobulin	I39
	EEC11332.1	0	0.0532	0	0.0817	0	0	0	alpha-2-macroglobulin	I39
	EEC10093.1	0	0.3147	0	0	0	0	0	alpha-macroglobulin	I39
	EEC11330.1	0	0	0	0.1348	0	0	0	alpha-macroglobulin	I39
Kazal	JAB72027.1	0.4631	0.6089	0.8341	0.5307	0.3106	0.6322	0.1064	Kazal-type serine protease inhibitor	I43
TCI	EEC06899.1	0.6346	0.3941	0	0	0	0	0	carboxypeptidase inhibitor	I68
Lipocalin	AAM93664.1	0.1845	0	0	0	0	0	0	tick histamine binding protein
	EEC03622.1	0.1187	0	0	0	0.1652	0	0	tick histamine binding protein
	AAY66819.1	0	0.0646	0.2203	0	0.5047	0	0	tick histamine binding protein
	EEC07234.1	0	0	0.4978	0.2485	0.8123	0	0	tick histamine binding protein
	JAA73346.1	0	0	0.2308	0.1122	0	0	0	lipocalin
	EEC19436.1	0	0	0	0.1915	1.6714	0	0.1573	tick histamine binding protein
	EEC18282.1	0	0	0	0	0.3016	0	0.1411	tick histamine binding protein
	EEC06937.1	0	0	0	0	0.3751	0	0.1321	tick histamine binding protein
	AAK97816.1	0	0	0	0	0.8435	0	0	tick histamine binding protein
	EEC20540.1	0	0	0	0	0.3854	0	0	tick histamine binding protein
	AAY66709.1	0	0	0	0	0.2461	0	0	tick histamine binding protein
	JAA71398.1	0	0	0	0	0.1738	0	0	lipocalin
	EEC10064.1	0	0	0	0	0.2645	0	0	tick histamine binding protein
	AAM93640.1	0	0	0	0	0.079	0	0	tick histamine binding protein
	JAA71927.1	0	0	0	0	0	0	1.7372	fatty acid-binding protein FABP
	JAB73357.1	0	0	0	0	0	0	0.2125	lipocalin
	EEC18789.1	0	0	0	0	0	0	0.1149	tick histamine binding protein
	EEC03498.1	0	0	0	0	0	0	0.0609	tick histamine binding protein
Antimicrobial	EEC20127.1	13.4038	8.2041	6.7223	1.9011	3.8815	1.0893	2.7811	microplusin-like
	AAY66495.1	2.9943	1.5917	2.6351	0.7898	0.9327	2.4917	0.4347	microplusin-like
	JAA68382.1	0.7642	0.3461	0.5023	0.1922	0	0	0	hebreain-like
	AAY66716.1	0	5.4712	0	1.7694	0	1.2149	2.5206	rinicusin-like
	EEC11013.1	0	0.2995	0	0	0	0	0	microplusin
	JAB76987.1	0	0.0468	0	0	0	0	0	lysozyme
	JAB76225.1	0	0	0	0	0	1.039	0	ricinusin-like
	EEC20126.1	0	0	0	0	0	0	0.1269	microplusin-like
Pathogen recognition domain	EEC07323.1	0.353	0.3559	0.3418	0.4408	0.0787	0.8762	0.2595	ML domain-containing protein
	EEC18444.1	0	0.4032	0.3471	0.4308	0	0	0.3213	salivary lipid interacting protein
	EEC02351.1	0	0.0076	0	0	0	0	0	hemolectin partial
	JAA72427.1	0	0.0521	0	0	0	0	0	gamma-interferon inducible lysosomal thiol reductase
	AAQ93650.1	0	0.03	0	0	0	0	0	ixoderin precursor
	AAY66804.1	0	0	0.1437	0	0.2212	0	0	nymphal anticomplement protein
	EEC11284.1	0	0	0	0	0	0	0.0897	complement C1q subcomponent-binding protein
Heme/Iron binding	EEC13579.1	3.931	3.6745	4.187	6.9012	3.954	8.9902	2.43	hemelipoprotein
	JAB70455.1	2.6248	2.4452	2.5964	4.8496	2.3315	5.6087	1.6855	hemelipoprotein
	JAB70362.1	2.4337	2.1396	2.4153	4.1611	2.0351	4.5242	1.403	hemelipoprotein
	EEC13578.1	1.3472	1.3743	1.1752	2.6366	0.9727	1.6093	0.7925	hemelipoprotein
	EEC17915.1	1.3675	1.051	0.8229	1.4538	0.5759	2.5326	0.5985	hemelipoprotein
	EEC18682.1	0.2318	0.1548	0.2118	0.2077	0.1531	0	0.0717	hemelipoprotein
	JAB68672.1	0.1276	0.213	0.0826	0.295	0.1219	0	0.1034	hemelipoprotein
	JAA65447.1	1.0818	0.994	1.1814	0.8475	0.826	0	0.2463	hemelipoprotein
	EEC17914.1	0.201	0.2554	0.0396	0.2372	0	0	0	hemelipoprotein
	JAB78019.1	0.1631	0.141	0	0.0974	0	0	0	hemelipoprotein
	JAB69086.1	0.1034	0.2417	0	0.57	0	0	0.0789	hemelipoprotein
	EEC13574.1	0	0.264	0.1303	0.5218	0	0.2368	0.1507	hemelipoprotein
	EEC13576.1	0	0.2874	0.2797	0.7295	0	0	0.0743	hemelipoprotein
	EEC05874.1	0	0.127	0	0.3189	0	0.2414	0.1066	hemelipoprotein
	EEC13575.1	0	0.0932	0	0.1147	0	0	0	hemelipoprotein
Anti-oxidants	EEC10299.1	0.0836	0.1748	0	0.1844	0.0469	0.1934	0.0814	peroxinectin
	AAY66814.1	0	0.4885	0.7235	0.4401	0.5611	0	0.232	selenium dependent salivary glutathione peroxidase
	EEC18154.1	0	0.3584	0.2765	0	0	0	0	superoxide dismutase Cu-Zn
	JAA71807.1	0	0.2424	0.2713	0	0	0	0	copper/zinc superoxide dismutase
	EEC08659.1	0	0.0488	0	0	0	0	0	sulfotransferase
	EEC15288.1	0	0.0594	0	0	0	0	0.1194	thioredoxin peroxidase 1
	EEC12074.1	0	0	0	0.7528	0	0	0.3503	glutathione peroxidase
	EEC10196.1	0	0	0	0	0.209	0	0.2103	superoxide dismutase Cu-Zn
	EEC08358.1	0	0	0	0	0	0.875	0.1793	peroxinectin partial
	JAB80638.1	0	0	0	0	0	0.6714	0.8049	dihydropteridine reductase
	EEC15887.1	0	0	0	0	0	0.234	0.451	aldehyde dehydrogenase
	JAB80665.1	0	0	0	0	0	0.2701	0.4673	formyltetrahydrofolate dehydrogenase
	JAA73111.1	0	0	0	0	0	0.1853	0	glutathione S-transferase
	EEC08975.1	0	0	0	0	0	0	0.1607	salivary sulfotransferase
	EEC09120.1	0	0	0	0	0	0	0.2261	glutathione S-transferase
	EEC11349.1	0	0	0	0	0	0	0.4787	glutathione S-transferase
	EEC17944.1	0	0	0	0	0	0	0.3499	glutathione S-transferase
	JAA73692.1	0	0	0	0	0	0	0.3716	glutathione S-transferase
	JAB74448.1	0	0	0	0	0	0	0.1555	salivary sulfotransferase
	JAB74492.1	0	0	0	0	0	0	0.2126	glutathione S-transferase
	JAB76061.1	0	0	0	0	0	0	0.0951	sulfotransferase
	JAB76194.1	0	0	0	0	0	0	0.0789	sulfotransferase partial
	AAK97814.1	0	0	0	0	0	0	0.6286	glutathione peroxidase
	EEC00149.1	0	0	0	0	0	0	0.1135	short-chain alcohol dehydrogenase
	EEC04332.1	0	0	0	0	0	0	0.0655	reductase
	EEC10122.1	0	0	0	0	0	0	0.3125	3-hydroxyanthranilate 3,4-dioxygenase
	EEC11990.1	0	0	0	0	0	0	0.1925	aldehyde dehydrogenase
	EEC18729.1	0	0	0	0	0	0	0.0419	aldehyde dehydrogenase
	EEC18748.1	0	0	0	0	0	0	0.2022	aldehyde dehydrogenase
	EEC20421.1	0	0	0	0	0	0	0.1144	carbonic anhydrase
	JAA70808.1	0	0	0	0	0	0	0.0697	catalase-like
	JAA71363.1	0	0	0	0	0	0	0.0659	glutaredoxin
	JAB78793.1	0	0	0	0	0	0	0.0233	glutathione s-transferase-like
	JAA72149.1	0	0	0	0	0	0	0.066	short-chain alcohol dehydrogenase
	JAB80046.1	0	0	0	0	0	0	0.2048	3-hydroxyanthranilate 3,4-dioxygenase
	AAY66786.1	0	0	0	0	0	0	0.2998	thioredoxin-dependent peroxide reductase
TSP of unknwon function	EEC05274.1	3.661	2.3145	3.9305	2.2064	0.6472	1.1641	0.3014	Is6, salivary secreted protein
	EEC09428.1	2.7061	1.2298	2.0812	1.0553	0.7034	2.2204	0.4854	8.9kDa
	JAB68991.1	2.4192	2.1169	4.2849	1.6894	2.0958	1.7604	0.3992	salivary secreted protein
	EEC03076.1	0.4367	0.708	0.4783	0.9939	0.1248	0.9078	0.2755	leucine-rich repeat protein
	EEC12988.1	0.7392	0.9421	1.2027	1.2152	0.305	0.9242	0.6507	salivary secreted protein
	EEC02577.1	0.1242	0.1188	0.3299	0.3207	0.1513	0.3806	0.0733	salivary secreted protein
	EEC11563.1	0.4211	0.5111	0.7913	1.068	0.3958	0.7284	0.1294	leucine-rich repeat protein
	JAA71682.1	1.316	1.2571	1.4688	1.2059	0.929	0	0.5195	AV422 (24kDa protein)
	EEC15670.1	1.4257	3.8201	6.0465	1.1428	1.9715	0	0.3429	salivary secreted protein
	JAA71095.1	1.508	1.2571	0.7265	2.2976	0.4162	0	0.6279	8.9kDa
	JAA66153.1	0.8605	0.4799	1.2141	0.9071	0.3987	0	0.2216	8.9kDa
	AAV80782.1	0.6459	0.4671	1.3358	0.5867	0.5277	0	0.2465	8.9kDa
	EEC14232.1	3.4317	1.6261	1.0815	0.9551	0.4213	0	0	insulin-like growth factor
	EEC00630.1	0.7365	1.2495	1.7873	2.1091	0	1.7739	1.1645	salivary secreted protein
	EEC13528.1	0.4625	0.2272	0.1927	0.1621	0	0	0.0895	salivary secreted protein
	JAB69233.1	0.4077	0.3226	0.2458	0.2692	0	0	0	insulin-like growth factor
	JAB80820.1	0.8345	0.6037	0.7753	0	0.184	0	0	salivary secreted protein
	EEC09430.1	0.5993	0.454	0.1201	0	0.2147	0	0	8.9kDa
	EEC03925.1	0.8064	0.1603	0.2102	0	0	0	0	salivary secreted protein
	JAA72493.1	1.0524	0.9153	0.4775	0	0	0	0	insulin-like growth factor
	EEC17489.1	1.542	1.2012	0	2.1299	0.4078	0	0.724	salivary secreted protein
	AAY66581.1	0.2532	0.3058	0	0.3199	0	0.3698	0.1067	salivary secreted protein
	AEE89467.1	0.2782	0.4442	0	0.9366	0	0	0.3645	antigen p23
	EEC07853.1	7.7866	2.3555	0	0	0	0	0	salivary secreted protein
	JAB78309.1	0.2398	0.0804	0	0	0	0	0	leucine-rich repeat protein
	EEC04019.1	0.1748	0.0522	0	0	0	0	0	salivary secreted protein
	JAA70058.1	0.1462	0.0745	0	0	0	0	0	putative cytotoxin-like
	AAN03859.1	0	0.3664	0.6956	0.3301	4.4816	2.5545	0	anticoagulant Salp9
	AAY66701.1	0	0.2253	1.3139	0.6137	0.7193	0	0.223	9.4 kDa protein
	EEC19293.1	0	0.9748	1.7993	0.8542	8.4688	0	0	anticoagulant Salp 11
	EEC17119.1	0	0.2101	0.7481	0.4286	0.3885	0	0	insulin-like growth factor
	EEC17564.1	0	0.1725	0.1287	0.2533	0	0	0	salivary secreted protein
	EEC00594.1	0	0.7373	0.7937	0.8938	0	0	0.3229	salivary secreted protein
	JAB77968.1	0	0.3687	0.4768	0.3891	0	0	0.359	salivary secreted protein
	EEC17389.1	0	0.0692	0.0747	0.2175	0	0	0.1071	salivary secreted protein
	EEC09584.1	0	0.1114	0.1617	0.1118	0	0	0.0605	salivary secreted protein
	EEC17391.1	0	0.1769	0.2063	0.4389	0	0	0.2979	salivary secreted protein
	EEC10413.1	0	0.2741	0.1571	0.1974	0	0	0	leucine-rich repeat protein
	EEC14908.1	0	0.1409	0.3327	0.2257	0	0	0	leucine-rich repeat protein
	AAY66632.1	0	0.1364	0.1798	0	0.8376	0	0	basic tail protein
	EEC20557.1	0	0.1542	0	0.1196	0	0	0.0562	leucine-rich repeat protein
	EEC00727.1	0	0.1057	0	0.1058	0	0	0.0669	leucine-rich repeat protein
	AAT92155.1	0	0.9079	0	4.876	0	0	0	basic tail protein
	JAA67159.1	0	0.2778	0	0.1065	0	0	0	cytotoxin-like protein
	EEC03021.1	0	0.2892	0	0.2403	0	0	0	leucine-rich repeat protein
	JAB79048.1	0	0.1323	0	0.2261	0	0	0	salivary secreted protein
	AAY66507.1	0	0.2822	0	0.3455	0	0	0	basic tail
	EEC00374.1	0	0.2338	0	0.1591	0	0	0	salivary secreted protein
	JAB75018.1	0	0.5519	0	0	4.5098	0	0	anticoagulant Salp9
	AAY66513.1	0	0.1001	0	0	0.3157	0	0	basic tail
	EEC01310.1	0	0.2172	0	0	0	0	0	salivary secreted protein
	EEC18201.1	0	0.1565	0	0	0	0	0	salivary secreted protein
	JAA67124.1	0	0.1379	0	0	0	0	0	Putative cytotoxin -like
	EEC11050.1	0	0.086	0	0	0	0	0	leucine-rich repeat protein
	JAB68914.1	0	0.0555	0	0	0	0	0	salivary secreted protein
	EEC16500.1	0	0.1005	0	0	0	0	0	salivary secreted protein
	EEC07845.1	0	0.0402	0	0	0	0	0	glutenin-like protein
	EEC16990.1	0	0.1293	0	0	0	0	0	salivary secreted protein
	JAB77348.1	0	0.1249	0	0	0	0	0	anticoagulant Salp9 or 11
	AAY66510.1	0	0.075	0	0	0	0	0	8.9kDa
	EEC08981.1	0	0.0696	0	0	0	0	0	insulin-like growth factor
	EEC06472.1	0	0.0196	0	0	0	0	0	salivary secreted protein
	JAA71434.1	0	0	0.3973	0.247	0.5913	0	0.2182	putative ixodegrin
	AAY66721.1	0	0	0.6445	0.3225	1.5502	0	0	salivary secreted protein
	JAA67672.1	0	0	0.1702	0.0911	0.5822	0	0	salivary secreted protein
	AAY66626.1	0	0	1.0847	0	1.8398	0	0	Salp10
	AAY66712.1	0	0	0.9805	0	1.5437	0	0	9.4kDa
	AAM93601.1	0	0	0.7616	0	3.3509	0	0	basic tail
	JAB82464.1	0	0	1.0733	0	0.3657	0	0	9.4kDa
	EEC20130.1	0	0	0.4898	0	0.46	0	0	salivary secreted protein
	JAA71176.1	0	0	0.5105	0	0.2991	0	0	9.4kDa
	AAY66817.1	0	0	0.471	0	3.4651	0	0	anticoagulant Salp9 / antigen P8
	EEC05171.1	0	0	0.1812	0	0	0	0.1116	salivary secreted protein
	EEC02397.1	0	0	0.5326	0	0	0	0	salivary secreted protein
	JAA69236.1	0	0	0.6083	0	0	0	0	basic tail
	AAY66799.1	0	0	0.1943	0	0	0	0	basic tail
	EEC14213.1	0	0	0.1373	0	0	0	0	salivary secreted protein
	JAB71516.1	0	0	0.0735	0	0	0	0	basic tail
	JAA67689.1	0	0	0.1185	0	0	0	0	Salp 16
	EEC01057.1	0	0	0.1937	0	0	0	0	salivary secreted protein
	AAV63538.1	0	0	0	0.5422	0.9628	0	0.2615	fed TSP 4/ basic tail protein
	AAM93598.1	0	0	0	0.5692	3.6332	0	0	basic tail
	EEC05876.1	0	0	0	0.1846	0	0.2903	0.0691	salivary secreted protein
	EEC08688.1	0	0	0	0.0694	0	0	0.1022	salivary secreted protein
	JAB71524.1	0	0	0	0.0252	0	0	0.0513	salivary secreted protein
	ABS72177.1	0	0	0	0.3063	0	0	0	Salp 20
	AAY66784.1	0	0	0	0.5226	0	0	0	anticogulant Salp9
	AAY66621.1	0	0	0	0.3049	0	0	0	basic tail
	ABS72178.1	0	0	0	0.1272	0	0	0	Salp 20
	EEC13721.1	0	0	0	0.1558	0	0	0	salivary secreted protein
	JAA69265.1	0	0	0	0	1.2723	0	3.2021	salivary secreted protein
	EEC00268.1	0	0	0	0	4.3475	0	0	5.3 kDa
	JAB76269.1	0	0	0	0	0.9634	0	0	basic tail
	AAT92133.1	0	0	0	0	0.5979	0	0	basic tail
	AAM93602.1	0	0	0	0	0.5614	0	0	basic tail
	AAY66504.1	0	0	0	0	0.4596	0	0	basic tail
	JAA72044.1	0	0	0	0	0.4248	0	0	8.9 / 9.4 kDa protein
	AAY66807.1	0	0	0	0	0.4085	0	0	anticoagulant Salp11
	AAM93588.1	0	0	0	0	0.2553	0	0	basic tail
	JAA68191.1	0	0	0	0	0.2388	0	0	anticoagulant Salp9
	AAY66634.1	0	0	0	0	0.2005	0	0	basic tail
	EEC09752.1	0	0	0	0	0.2475	0	0	salivary secreted protein
	JAA67829.1	0	0	0	0	0.119	0	0	salivary secreted protein
	JAB70870.1	0	0	0	0	0.1817	0	0	salivary secreted protein
	AAY66752.1	0	0	0	0	0.0911	0	0	ixodegrin RGD motif
	JAB70222.1	0	0	0	0	0	0.7861	0.1692	salivary secreted protein
	EEC00418.1	0	0	0	0	0	0	0.2978	salivary secreted protein
	EEC17587.1	0	0	0	0	0	0	0.0352	salivary secreted protein
	EEC18199.1	0	0	0	0	0	0	0.2888	salivary secreted protein
	EEC19063.1	0	0	0	0	0	0	0.2094	salivary secreted protein
	JAA69943.1	0	0	0	0	0	0	0.0923	salivary secreted protein
	JAB81014.1	0	0	0	0	0	0	0.1485	salivary secreted protein
Glycine-rich	EEC14463.1	0.3324	0.466	0.8537	0.932	0.1875	1.8812	0.6259	glycine-rich cell wall structural protein
	EEC14470.1	0.3681	0.1853	0.2948	0.3937	0	0.7958	0.2019	glycine-rich protein
	JAA73102.1	0.268	0	0	0	0	1.9412	0.6265	glycine-rich cell wall structural protein
	JAA65987.1	0.1318	0	0.8189	0.4523	0	0	0	Glycine rich protein
	EEC15773.1	0	0.0219	0.0934	0.1632	0	0	0.0212	alpha-1 collagen type III partial
	EEC14464.1	0	0.171	0	0.1782	0	0.9557	0.4052	glycine proline-rich secreted protein
	EEC14465.1	0	0.0977	0	0.2864	0	0	0.108	glycine-rich secreted protein
	JAB80018.1	0	0.0918	0	0.2813	0	0	0.1015	glycine-rich secreted protein
	EEC14471.1	0	0.1976	0	0.2689	0	0	0.343	glycine-rich
	EEC19501.1	0	0.0513	0	0.0526	0	0	0	cuticle protein GGY
	JAB72558.1	0	0.8142	0	0.1501	0	0	1.3524	glycine-rich protein
	JAA65274.1	0	0.2291	0	0.2168	0	0	0.2667	glycine-rich cell wall structural protein
	JAB77012.1	0	0.053	0	0	0	0	0.0684	glycine rich protein
	AAY66552.1	0	0	1.2347	0.8664	1.1976	0	0.2518	glycine & proline rich
	JAA64643.1	0	0	0	0.0767	0	0	0	glycine/proline-rich protein
	JAB76423.1	0	0	0	0	0	0	0.1854	glycine-rich protein
	EEC14469.1	0	0	0	0	0	0	0.0431	glycine-rich protein
Extracellular matrix	EEC01919.1	0.1318	0.4575	0.9847	0.6017	0	0	0	Insect cuticle protein
	EEC03473.1	0.2435	0.1542	0.2283	0	0	0	0	cuticle protein
	JAB79162.1	0	0.1257	0.1986	0	0	0	0	chitin binding peritrophin A
	EEC09567.1	0	0.131	0	0	0	0	0.1439	Chitin-binding domain type 2
	EEC02524.1	0	0.0198	0	0	0	0	0	chitin binding peritrohin A
	EEC01136.1	0	0	0	0	0	0.9718	0.3926	Chitin binding Peritrophin-A domain
	EEC03471.1	0	0	0	0	0	0	0.3037	cuticular protein
	JAB70365.1	0	0	0	0	0	0	0.0473	peritrophic membrane chitin binding protein
	EEC08503.1	0	0	0	0	0	0	0.1936	cuticular protein
Cytoskeletal	BAF98180.1	0.6184	0.7092	0.9284	0.9414	0.3869	0.7934	0.6299	actin
	JAB83342.1	0.2936	0.3698	0.3397	0.3256	0	0.2355	0.2803	tropomyosin
	JAA67030.1	0.2057	0.1901	0.1081	0.1998	0	0	0.0618	calponin
	JAA70823.1	0.3861	0.3883	0.1928	0.2488	0	0	0.4425	thymosin
	JAA71405.1	0.5636	0.6557	0.2815	0.3631	0	0	0.7234	thymosin
	JAB77987.1	0.1815	0.0792	0.3441	0.0632	0	0	0	myosin regulatory light chain
	JAA71876.1	0	0.2576	0	0	0	0	0.3049	actin depolymerizing factor
	JAB76920.1	0	0.0339	0	0	0	0	0.0591	actin-interacting protein 1-like
	JAB83396.1	0	0.1929	0.1687	0	0	0	0	muscle LIM protein isoform A isoform
	AEO32669.1	0	0.0339	0.046	0	0	0	0.1843	alpha tubulin
	AEO32842.1	0	0.2389	0	0.3292	0	0	0	muscle LIM protein
	JAB77551.1	0	0.0172	0	0.0128	0	0	0	filamin-A
	JAB82262.1	0	0.1322	0	0.146	0	0	0.1011	putative wip
	EEC12307.1	0	0.03	0	0	0	0	0.0351	pyruvate kinase muscle isozyme-like isoform 1
	JAB78719.1	0	0.0545	0	0	0	0	0.0364	alpha actinin
	JAB83767.1	0	0.0508	0	0	0	0	0.0746	beta tubulin
	Q8IT89.1	0	0	0.2744	0.314	0	0.2355	0.2803	tropomyosin-like isoform 2
	JAB77330.1	0	0	0	0	0	0.1547	0.0172	paramyosin
	JAB82983.1	0	0	0	0	0	0.2355	0.2139	tropomyosin
	JAB83083.1	0	0	0	0	0	0.1151	0	myosin class i heavy chain
	EEC14090.1	0	0	0	0	0	0	0.0324	spectrin beta chain
	EEC14126.1	0	0	0	0	0	0	0.2128	radixin moesin
	EEC14134.1	0	0	0	0	0	0	0.2278	calponin
	EEC18404.1	0	0	0	0	0	0	0.3443	profilin
	JAA58012.1	0	0	0	0	0	0	0.0467	lethal (2) 37Cc
	JAA65622.1	0	0	0	0	0	0	0.2604	nonmuscle myosin essential light chain
	JAB74914.1	0	0	0	0	0	0	0.0329	spectrin alpha chain
	JAB75675.1	0	0	0	0	0	0	0.0418	spectrin beta chain
	JAB75990.1	0	0	0	0	0	0	0.0346	hu li tai shao protein
	JAB83012.1	0	0	0	0	0	0	0.0675	GDP dissociation inhibitor
	JAB84247.1	0	0	0	0	0	0	0.0162	myosin heavy chain non-muscle-like isoform X6
	JAB84323.1	0	0	0	0	0	0	0.1138	cAMP protein rating peptide precursor
Protein Modification Machinery	EEC04431.1	1.7433	2.0237	0.9853	1.3025	0.2076	0	0.1993	lysosomal acid phosphatase
	JAA67812.1	0.1952	0.2463	0	0.2102	0.1292	0.6492	0.6586	heat shock protein
	JAB76832.1	0.2289	0.1999	0	0.1901	0	0.5599	0.2737	14-3-3 protein zeta
	JAA67381.1	0.244	0.1884	0	0.2088	0.6671	0	0.2552	cyclophilin type peptidyl-prolyl cis-trans isomerase
	JAB82375.1	0.1713	0.272	0	0.205	0	0	0.6457	heat shock protein beta 6
	EEC18473.1	0	0.0407	2.0908	0.0359	0	0.4659	0.6954	heat shock protein HSP 90-alpha-like
	JAA67522.1	0	0.0407	2.0908	0.0359	0	0.4659	0.6644	heat shock protein HSP 90-alpha-like
	EEC05056.1	0	0.0775	0	0.0716	0.089	0.5325	0.4829	heat shock protein
	JAB76036.1	0	0.0199	0	0.0133	0	0.1376	0.1251	heat shock protein
	EEC05122.1	0	0.0565	0	0	0.1247	0.2568	0.8152	chaperonin subunit
	EEC04894.1	0	0	0.0867	0	0	0	0	α-crystallin domain, HSP
	AEO32791.1	0	0	0	0.1961	0	0.6088	0	heat shock protein
	JAA65893.1	0	0	0	0	0.3118	0.8819	0.5568	protein disulfide-isomerase A3
	EEC01613.1	0	0	0	0	0.2701	1.1635	0.6332	protein disulfide-isomerase A3
	EEC15473.1	0	0	0	0	0.1233	1.129	0.6296	protein disulfide-isomerase
	EEC12432.1	0	0	0	0	0	0.2155	0.0893	phosphoglycerate mutase
	JAB76852.1	0	0	0	0	0	0.7886	2.0145	heat shock protein
	AEO33913.1	0	0	0	0	0	0.6507	0	heat shock protein
	BAF73714.1	0	0	0	0	0	0	0.0318	transitional endoplasmic reticulum ATPase TER94
	EEC00912.1	0	0	0	0	0	0	0.0579	homocysteine S-methyltransferase
	EEC01318.1	0	0	0	0	0	0	0.0463	chaperonin complex component TCP-1 gamma subunit
	EEC04085.1	0	0	0	0	0	0	0.1975	protein disulfide-isomerase A6-like
	EEC06642.1	0	0	0	0	0	0	0.057	reticulon-like1
	EEC14106.1	0	0	0	0	0	0	0.1135	14-3-3 protein epsilon
	EEC15893.1	0	0	0	0	0	0	0.0472	chaperonin complex component TCP-1 theta subunit
	EEC16457.1	0	0	0	0	0	0	0.1472	tumor rejection antigen (gp96)
	EEC17212.1	0	0	0	0	0	0	0.0184	hypoxia up-regulated 1
	EEC17465.1	0	0	0	0	0	0	0.0389	deoxyhypusine synthase
	AEO35329.1	0	0	0	0	0	0	0.0455	cpn60 chaperonin family
	JAA67239.1	0	0	0	0	0	0	0.087	peptidyl-prolyl cis-trans isomerase
	JAA67727.1	0	0	0	0	0	0	1.602	small heat shock protein
	JAA67729.1	0	0	0	0	0	0	0.3348	small heat shock protein
	JAA68185.1	0	0	0	0	0	0	0.0559	chaperone-mediated protein complex assembly
	JAA68471.1	0	0	0	0	0	0	0.2895	FK506 binding protein 4
	JAA70114.1	0	0	0	0	0	0	0.1316	peptidyl-prolyl cis-trans isomerase
	JAA70344.1	0	0	0	0	0	0	0.1963	heat shock 70 kDa protein cognate 5
	JAB75807.1	0	0	0	0	0	0	0.0557	homocysteine S-methyltransferase
	EEC03541.1	0	0	0	0	0	0	0.0897	methylmalonate semialdehyde dehydrogenase
	EEC04627.1	0	0	0	0	0	0	0.0199	prolyl endopeptidase
	EEC09272.1	0	0	0	0	0	0	0.1459	putative L-aspartate dehydrogenase-like
	EEC11535.1	0	0	0	0	0	0	0.0408	gamma-glutamyltranspeptidase
	EEC12854.1	0	0	0	0	0	0	0.0865	6-phosphogluconate dehydrogenase
	EEC16235.1	0	0	0	0	0	0	0.1294	histidine ammonia lyase
	AEO35128.1	0	0	0	0	0	0	0.0204	26S protease regulatory subunit 8-like isoform X4
	JAA65196.1	0	0	0	0	0	0	0.0577	aconitate hydratase
	JAA68174.1	0	0	0	0	0	0	0.0649	probable methylmalonate-semialdehyde dehydrogenase
	EEC01793.1	0	0	0	0	0	0	0.1123	Rhodanese homology domain (Protein Modification Mach)
	JAA68318.1	0	0	0	0	0	0	0.1167	processing peptidase beta subunit
	JAA72134.1	0	0	0	0	0	0	0.0491	dehydrogenase/reductase SDR family member 4-like
Metabolism, carbohydrates	JAB70416.1	0.0662	0.1455	0.1581	0.209	0	0.516	0.1059	catalytically inactive chitinase-like lectins
	EEC01936.1	0.1214	0.2075	0	0.1984	0	0	0.1081	catalytically inactive chitinase-like lectins
	JAA68780.1	0	0.1854	0	0.1911	0.2097	0.7873	0.3973	enolase
	EEC14101.1	0	0.1179	0	0	0.0551	0.6142	1.1658	fructose 16-bisphosphate aldolase
	JAA65651.1	0	0	0	0.0234	0	0.1574	0.0882	glucose phosphate isomerase 1
	JAB83216.1	0	0	0	0	0.1311	0.3998	0.446	aminoimidazole-4-carboxamide ribonucleotidetransformylase/IMP cyclohydrolase
	EEC10490.1	0	0	0	0	0.1331	0	0.3529	aminoimidazole-4-carboxamide ribonucleotidetransformylase/IMP cyclohydrolase
	EEC01760.1	0	0	0	0	0	0	0.0772	amidophosphoribosyltransferase-like
	EEC07486.1	0	0	0	0	0	0	0.1975	fructose-16-bisphosphatase 1
	EEC15079.1	0	0	0	0	0	0	0.1142	phosphoglucomutase/phosphomannomutase
	EEC16479.1	0	0	0	0	0	0	0.0868	glucosidase II
	JAA56695.1	0	0	0	0	0	0	0.0183	6-phosphofructo-2-kinase/fructose 2,6-bisphosphatase
	JAA61728.1	0	0	0	0	0	0	0.1001	phosphoglucomutase-2
	JAA65513.1	0	0	0	0	0	0	0.1553	phosphoenolpyruvate carboxykinase cytosolic GTP -like
	JAA68469.1	0	0	0	0	0	0	0.0786	hexokinase
	JAA72359.1	0	0	0	0	0	0	0.0287	dolichyl-diphosphooligosaccharide
	JAA72559.1	0	0	0	0	0	0	0.0728	phosphoribosyl pyrophosphate synthetase
	JAB71375.1	0	0	0	0	0	0	0.0359	5' nucleotidase ecto
	JAB76025.1	0	0	0	0	0	0	0.078	glucosidase II
	JAB83240.1	0	0	0	0	0	0	0.017	Queuine tRNA-ribosyltransferase
Metabolism, energy	JAA68969.1	0.2987	0.27	0.1035	0.1407	0	0.5201	0.2932	glyceraldehyde 3-phosphate dehydrogenase
	ACH88101.1	0.3244	0.2964	0.1343	0	0	0	0	glyceraldehyde-3-phosphate dehydrogenase
	JAA69917.1	0	0.1162	0	0.104	0.1404	1.0097	0.2146	triose phosphate isomerase
	EEC05916.1	0	0.0825	0	0	0.3725	1.0524	0.5402	malate dehydrogenase 2
	JAB70837.1	0	0.0477	0	0	0.0765	0	0.1622	malate dehydrogenase
	JAB68957.1	0	0.08	0	0	0	0	0	flavocytochrome b2
	EEC13429.1	0	0.0337	0	0	0	0	0.1068	triose phosphate isomerase
	JAB69758.1	0	0.0478	0	0	0	0	0	putative adenylate cyclase terminal-differentiation
	EEC13206.1	0	0	0	0	0.5973	0	0.4129	cytochrome C
	EEC07769.1	0	0	0	0	0.1372	0	0	glyceraldehyde 3-phosphate dehydrogenase
	JAB83808.1	0	0	0	0	0	0.3231	0.5007	GMP synthase
	EEC07159.1	0	0	0	0	0	0.3212	0	GMP synthase
	EEC00203.1	0	0	0	0	0	0	0.2543	adenylosuccinate lyase
	EEC00562.1	0	0	0	0	0	0	0.291	GTP-specific succinyl-CoA synthetase beta subunit
	EEC01759.1	0	0	0	0	0	0	0.4658	phosphoribosylamidoimidazole-succinocarboxamide synthase
	EEC04254.1	0	0	0	0	0	0	0.3254	NADP-dependent isocitrate dehydrogenase
	EEC06067.1	0	0	0	0	0	0	0.0724	cytochrome b5 domain-containing protein partial
	EEC06183.1	0	0	0	0	0	0	0.099	ATP synthase H+ transporting F1 complex delta subunit precursor
	EEC15985.1	0	0	0	0	0	0	0.1977	electron transfer flavoprotein
	EEC16250.1	0	0	0	0	0	0	0.0688	enoyl-CoA hydratase
	EEC17118.1	0	0	0	0	0	0	0.0575	F0F1-type ATP synthase beta subunit
	JAA60054.1	0	0	0	0	0	0	0.0589	glutamate dehydrogenase mitochondrial-like
	JAA65673.1	0	0	0	0	0	0	0.2851	F0F1-type ATP synthase alpha subunit
	JAA65921.1	0	0	0	0	0	0	0.033	cytochrome b-c1 complex subunit 2
	JAA66137.1	0	0	0	0	0	0	0.2407	NADP-dependent isocitrate dehydrogenase
	JAA66712.1	0	0	0	0	0	0	0.3011	C-1-tetrahydrofolate synthase
	JAA68216.1	0	0	0	0	0	0	0.8758	inosine-5'-monophosphate dehydrogenase 2-like
	JAA68593.1	0	0	0	0	0	0	0.1111	3-phosphoglycerate kinase
	JAA69384.1	0	0	0	0	0	0	0.0917	electron transfer flavoprotein alpha subunit
	JAA72360.1	0	0	0	0	0	0	0.0719	succinate dehydrogenase
	JAA72508.1	0	0	0	0	0	0	0.2308	3-phosphoglycerate dehydrogenase
	JAA73267.1	0	0	0	0	0	0	0.024	succinyl-CoA ligase ADP-forming subunit beta
	AAT92214.1	0	0	0	0	0	0	0.1363	cytochrome C oxidase subunit Va
	JAB73948.1	0	0	0	0	0	0	0.0565	aldehyde dehydrogenase 8 family
	JAB74645.1	0	0	0	0	0	0	0.2187	ubiquinol-cytochrome C reductase hinge protein
	JAB74970.1	0	0	0	0	0	0	0.1953	cytochrome B5
	JAB75685.1	0	0	0	0	0	0	0.2405	pyridoxal kinase
	JAB75735.1	0	0	0	0	0	0	0.1512	ATPase inhibitor
	JAB75902.1	0	0	0	0	0	0	0.1763	ATP synthase E chain
	JAB75988.1	0	0	0	0	0	0	0.0718	citrate synthase
	JAB76453.1	0	0	0	0	0	0	0.095	mitochondrial ATP synthase coupling factor 6
	JAB77526.1	0	0	0	0	0	0	0.0858	methylglutaconyl-CoA hydratase
	JAB80925.1	0	0	0	0	0	0	0.1239	succinyl-CoA ligase subunit alpha mitochondrial-like
	JAB83023.1	0	0	0	0	0	0	0.0221	ATP-citrate synthase-like
	AAY66872.1	0	0	0	0	0	0	0.1742	ATP synthase D chain
Metabolism, lipid	EEC08686.1	0.0868	0.0547	0	0.0659	0	0	0.0432	Niemann-Pick type C1 domain-containing protein
	EEC08687.1	0	0.0776	0.1428	0	0	0	0	Niemann-Pick type C1 protein
	EEC01138.1	0	0	0	0	0	0	0.1513	medium-chain acyl-CoA dehydrogenase
	EEC10817.1	0	0	0	0	0	0	0.089	acyl-CoA synthetase
	EEC11711.1	0	0	0	0	0	0	0.0769	fatty acid synthase
	EEC16372.1	0	0	0	0	0	0	0.0613	acyl-CoA synthetase
	JAA69554.1	0	0	0	0	0	0	0.0885	3-hydroxyacyl-CoA dehydrogenase
	JAA71130.1	0	0	0	0	0	0	0.0627	probable medium-chain specific acyl-CoA dehydrogenase mitochondrial-like
	JAA73557.1	0	0	0	0	0	0	0.1069	acyl-CoA synthetases
	JAB69653.1	0	0	0	0	0	0	0.0296	esterase
	JAB72096.1	0	0	0	0	0	0	0.037	acyl-CoA synthetase
	JAB74027.1	0	0	0	0	0	0	0.022	acyl-CoA synthetase
	JAB75334.1	0	0	0	0	0	0	0.1083	acetyl-Coenzyme A acetyltransferase 1
	JAB76429.1	0	0	0	0	0	0	0.1517	20-hydroxysteroid dehydrogenase
	JAB77646.1	0	0	0	0	0	0	0.0945	retinal dehydrogenase 1
Nuclear Regulation	AEO34838.1	0.6035	0.5706	0.5495	0.762	0.42	2.4833	0.66	histone H2B.3-like
	JAA72470.1	0	0.1917	0	0	0	0	0.2728	histone H3 embryonic-like
	EEC09815.1	0	0	0	0	0	0	0.0388	lysine ketoglutarate reductase
	EEC17023.1	0	0	0	0	0	0	0.0746	histone
	AEO32551.1	0	0	0	0	0	0	0.0346	heterogeneous nuclear ribonucleoprotein H-like isoform X2
	JAA67861.1	0	0	0	0	0	0	0.0983	regulation of chromatin silencing
	JAA72897.1	0	0	0	0	0	0	0.1501	DPY-30 protein
Signal Transduction	JAA70612.1	0.352	0.1457	0	0.1123	0	0	0.1615	calmodulin
	EEC02492.1	0	0.0369	0	0.0656	0	0	0.0679	fasciclin
	JAB76467.1	0	0.3736	0	0	0	0	0.2074	putative protein cngb1
	JAA59050.1	0	0	0	0	0	0	0.057	hypothetical protein similar to ras-related protein Rab-9a
	JAA70659.1	0	0	0	0	0	0	0.0476	hypothetical protein similar to protein kinase C substrate 80 KD protein heavy chain
	JAB82568.1	0	0	0	0	0	0	0.5316	putative sry similar to PDZ domain-containing protein
	JAB79878.1	0	0	0	0	0	0	0.0554	hypothetical protein similar to ns1 binding protein
	JAB83685.1	0	0	0	0	0	0	0.0341	putative polyadenylate-binding protein
Proteosome Machinery	EEC14178.1	0.0478	0.063	0.0847	0.0477	0.1079	0.1921	0.2878	ubiquitin/40S ribosomal protein S27A fusion
	JAA67158.1	0	0.0359	0	0	0	0	0.0835	proteasome subunit beta type-1-like
	EEC07624.1	0	0	0	0	0	0	0.0687	proteasome beta2 subunit
	EEC09106.1	0	0	0	0	0	0	0.0626	ubiquitin-activating enzyme E1
	EEC14078.1	0	0	0	0	0	0	0.0719	proteasome subunit alpha type
	EEC18223.1	0	0	0	0	0	0	0.0982	ubiquitin carboxyl-terminal hydrolase isozyme L3
	EEC19185.1	0	0	0	0	0	0	0.1733	calcyclin-binding protein
	JAA69292.1	0	0	0	0	0	0	0.0936	ubiquitin partial
	JAA69929.1	0	0	0	0	0	0	0.1738	proteasome subunit alpha type-5
	JAB83693.1	0	0	0	0	0	0	0.0204	UV excision repair protein RAD23 homolog B
Transporters/ Receptors	JAB71606.1	0	0.0604	0.0271	0.2295	0.0212	0.084	0.0859	apolipophorin
	EEC05877.1	0	0.2139	0	0.4739	0	0	0.1884	apolipophorin
	JAB78095.1	0	0.2304	0	0.1678	0	0	0	glutamate receptor 1-like
	JAB70985.1	0	0.009	0	0.0127	0	0.0684	0.0157	low-density lipoprotein receptor
	EEC13303.1	0	0.0103	0	0.0174	0	0	0.0032	apolipophorins-like
	EEC07802.1	0	0.3166	0	0.3279	0	0	0.2061	alpha-2-macroglobulin receptor
	JAB68889.1	0	0.0899	0	0	0	0	0	very low-density lipoprotein receptor
	EEC19423.1	0	0.1409	0	0	0	0	0	sodium/potassium-transporting ATPase subunit beta-2-like isoform X9
	JAB71468.1	0	0	0	0.0192	0	0	0	apolipoprotein B-100
	EEC02000.1	0	0	0	0	0	0	0.171	voltage-dependent anion-selective channel
	EEC03216.1	0	0	0	0	0	0	0.1054	sodium/potassium-transporting atpase subunit alpha
	EEC15526.1	0	0	0	0	0	0	0.1681	CDGSH iron sulfur domain-containing protein
	EEC16135.1	0	0	0	0	0	0	0.1018	purine permease
	JAA65572.1	0	0	0	0	0	0	0.023	amino acid transporter
	JAA68299.1	0	0	0	0	0	0	0.078	vacuolar H+-ATPase V1 sector subunit B
	JAA71315.1	0	0	0	0	0	0	0.068	chloride channel
	JAA70141.1	0	0	0	0	0	0	0.0552	Mesd superfamily
	AAY66852.1	0	0	0	0	0	0	0.1837	ADP/ATP translocase
	ADZ96258.1	0	0	0	0	0	0	0.1131	TRE31
Protein export machinery	EEC17151.1	0	0.0467	0.0722	0	0	0	0	vesicle coat complex COPII subunit SFB3
	AAR29958.1	0	0.082	0	0	0.62	0.6653	0.4788	calreticulin
	AAR29959.1	0	0.082	0	0	0	0.6392	0.4788	calreticulin
	EEC12390.1	0	0	0	0	0	0	0.0775	receptor expression-enhancing protein 5-like isoform 1
	JAA69452.1	0	0	0	0	0	0	0.1503	transaldolase 1
	JAA72620.1	0	0	0	0	0	0	0.0259	annexin A4
	JAA72755.1	0	0	0	0	0	0	0.1192	coiled-coil tumor protein D52
	JAB75415.1	0	0	0	0	0	0	0.0051	clathrin heavy chain 1
	JAB75482.1	0	0	0	0	0	0	0.0423	tricarboxylate transport protein
	AAY66839.1	0	0	0	0	0	0	0.0436	signal sequence receptor beta
Protein Synthesis Machinery	JAB70610.1	0	0.0425	0.1031	0	0	0	0	translation initiation factor
	JAB82122.1	0	0	0	0	0.1164	0	0.1267	60S acidic ribosomal protein P1-like
	EEC13271.1	0	0	0	0	0	0.4343	0.3088	translation elongation factor EF-1 alpha/Tu
	EEC15141.1	0	0	0	0	0	0.8559	0.2301	translation initiation inhibitor UK114/IBM1
	JAB71416.1	0	0	0	0	0	0.4688	0.3035	elongation factor
	EEC20173.1	0	0	0	0	0	0.2673	0.1959	elongation factor
	JAA71856.1	0	0	0	0	0	0.5136	0.17	40S ribosomal protein S10
	EEC01796.1	0	0	0	0	0	0	0.1224	translation initiation factor 4F helicase subunit
	EEC09512.1	0	0	0	0	0	0	0.0453	ribosomal protein L4
	EEC13927.1	0	0	0	0	0	0	0.0417	translation elongation factor
	EEC18636.1	0	0	0	0	0	0	0.019	aspartyl/asparaginyl-tRNA synthetases
	AEO32406.1	0	0	0	0	0	0	0.141	60S ribosomal protein L13-like
	AEO34078.1	0	0	0	0	0	0	0.0867	40S ribosomal protein SA
	JAA55232.1	0	0	0	0	0	0	0.0128	protein CASC3
	JAA58946.1	0	0	0	0	0	0	0.1184	ribosomal protein L11
	JAA69060.1	0	0	0	0	0	0	0.0279	ribosomal protein L3
	JAA69510.1	0	0	0	0	0	0	0.1013	60S acidic ribosomal protein P0
	JAA71716.1	0	0	0	0	0	0	0.0664	60S ribosomal protein L13-like
	JAA71866.1	0	0	0	0	0	0	0.1443	60S ribosomal protein L14
	JAA72124.1	0	0	0	0	0	0	0.1104	60S ribosomal protein L29
	JAB69686.1	0	0	0	0	0	0	0.0836	ribosomal protein L18
	JAB75945.1	0	0	0	0	0	0	0.2705	ribosomal protein large p2
	JAB77459.1	0	0	0	0	0	0	0.1654	40S ribosomal protein S3-B-like
	JAB77868.1	0	0	0	0	0	0	0.2705	40s ribosomal protein s28
	AAY66848.1	0	0	0	0	0	0	0.0961	60S ribosomal protein L7a-like isoform X4
Metabolism, Nucleotide	EEC06888.1	0	0.0617	0	0.1733	0	0	0.1155	Rossman-fold NAD(P) binding
	EEC13739.1	0	0.0354	0	0	0	0	0	primase, P4 family, C-term
	EEC05404.1	0	0	0	0	0.7227	1.7733	0.8082	ribonuclease UK114-like
	EEC01580.1	0	0	0	0	0	0.3815	1.1912	inosine-5'-monophosphate dehydrogenase 2
	EEC01170.1	0	0	0	0	0	0	0.0596	adenylsulfate kinase
	EEC03158.1	0	0	0	0	0	0	0.2707	phosphoribosylglycinamide formyltransferase
	EEC03415.1	0	0	0	0	0	0	0.1153	phosphoribosylformylglycinamidine synthase (FGAR amidotransferase)
	EEC04253.1	0	0	0	0	0	0	0.0233	nicotinamide nucleotide transhydrogenase
	EEC17755.1	0	0	0	0	0	0	0.3125	ADP-ribose diphosphatase
	EEC18716.1	0	0	0	0	0	0	0.077	staphylococcal nuclease domain-containing protein 1-like
	JAA59537.1	0	0	0	0	0	0	0.1809	3'(2')5'-bisphosphate nucleotidase 1
	JAA65606.1	0	0	0	0	0	0	0.1981	nucleoside diphosphate kinase
	JAA71492.1	0	0	0	0	0	0	0.5622	purine nucleoside phosphorylase 5a - transferase
	JAA71880.1	0	0	0	0	0	0	0.0628	IMP-GMP specific 5'-nucleotidase
	JAB75679.1	0	0	0	0	0	0	0.0931	phosphoribosylformylglycinamidine synthase (FGAR amidotransferase)
Metabolism, Amino Acid	EEC12308.1	0	0	0	0	0	0.5025	0.1877	phosphoserine aminotransferase
	EEC01200.1	0	0	0	0	0	0	0.3634	3-phosphoglycerate dehydrogenase
	EEC09067.1	0	0	0	0	0	0	0.0173	glycine decarboxylase
	EEC12306.1	0	0	0	0	0	0	0.0943	fumarylacetoacetate hydrolase
	EEC13628.1	0	0	0	0	0	0	0.4418	urocanate hydratase-like
	EEC14367.1	0	0	0	0	0	0	0.0352	alpha-ketoglutarate decarboxylase
	EEC18806.1	0	0	0	0	0	0	0.124	arginase
	EEC20451.1	0	0	0	0	0	0	0.1279	pseudouridine-metabolizing bifunctional protein
	JAA66004.1	0	0	0	0	0	0	0.1603	adenosylhomocysteinase
	JAA68324.1	0	0	0	0	0	0	0.0635	serine hydroxymethyltransferase
	JAA69056.1	0	0	0	0	0	0	0.0578	3-hydroxyisobutyryl-CoA hydrolase
	JAA69150.1	0	0	0	0	0	0	0.1524	phosphoserine aminotransferase
	JAA72287.1	0	0	0	0	0	0	0.346	glutamate-ammonia ligase (glutamine synthetase)
	JAB70884.1	0	0	0	0	0	0	0.087	aminomethyltransferase
	JAB75242.1	0	0	0	0	0	0	0.0191	glutamate synthase 1 [NADH]
	JAB75594.1	0	0	0	0	0	0	0.1524	tryptophan 2,3-dioxygenase-like
	JAB75733.1	0	0	0	0	0	0	0.0651	tyrosine aminotransferase
	JAB75907.1	0	0	0	0	0	0	0.1087	arginase
	JAB77628.1	0	0	0	0	0	0	0.2248	formimidoyltransferase-cyclodeaminase-like
	JAB80560.1	0	0	0	0	0	0	0.2073	glycine/serine hydroxymethyltransferase
Metabolism, intermediate	EEC05995.1	0	0	0	0	0	0	0.0662	carbon-nitrogen hydrolase
Transcription Machinery	EEC18208.1	0	0.0959	0	0.0584	0	0	0	ribonuclease E
	EEC10609.1	0	0	0	0	0	0	0.1766	RNA-binding protein musashi
	CBV00242.1	0	0	0	0	0	0	0.0676	DNA-binding protein
	JAA66783.1	0	0	0	0	0	0	0.1391	dna replication factor/protein phosphatase inhibitor set/spr-2
	JAB75826.1	0	0	0	0	0	0	0.083	plasminogen activator inhibitor 1 RNA-binding protein-like isoform X2
	EEC11837.1	0	0	0	0	0	0	0.065	RNA recognition motif
	JAB83988.1	0	0	0	0	0	0	0.0299	DEAD box ATP-dependent RNA helicase
	EEC01153.1	0	0	0	0	0	0	0.0356	ribonuclease E
Legend:
Column A represents the functional classification of Ixodes scapularis saliva proteins identified.
Column B represents the accession number of identifed protein from NCBI database.
Column C - I represents the normalized percentage of NSAF values per saliva protein identified from ticks that fed on rabbits for 24, 48, 72, 96, and 120 h, ticks that were engorged but not detached (BD) and ticks that were engorged and detached (SD)
Column J represents the annotation from NCBI database for each protein.
Column K represents the Merops Family identification of proteases and proteases inhibitors.

## Sheet: Rabbit
Classification	Accession #	24h	48h	72h	96h	120h	BD	SD	Uniprot annotation:
Heme/Iron Binding	G1U9S2	72.3096	30.6145	2.20584	12.9315	29.2324	13.7768	10.3877	serum albumin
	G1U754	2.22035	1.57722	0	0.71535	0	0	1.84351	histidine-rich glycoprotein
	G1TFW8	0	2.99149	0.315411	2.77564	6.69893	0.713613	1.23742	lactotransferrin
	P19134	0	2.84721	0	0.796896	4.63407	0.958751	2.22086	serotransferrin
	G1TVS4	0	1.45966	0	0	1.3443	0	0.739376	hemopexin
	G1SWF6	0	0	0	0	0	0	0.344736	haptoglobin
Cytoskeletal	G1U031	0	0.648415	0.107779	0	0	0	1.27919	tubulin alpha-1A chain isoform X3
	P62740	0	0	0.973926	0	1.89667	1.15496	0	actin-2
	G1U466	0	0	0.117816	0	0	0	0	tubulin alpha-1A chain isoform X3
	G1T229	0	0	0	0.0468762	0.13602	0	0	filaggrin-2
Anti-oxidants	G1T6W7	0	0	0	0	0	0	0.157044	catalase
Immunity-related	P25230	5.61939	2.42537	1.05533	3.36808	1.63759	0	1.29132	antimicrobial protein CAP18
	G1TRW8	0	6.02342	1.66252	6.12157	7.11247	5.71497	4.52943	neutrophil gelatinase-associated lipocalin
	P26203	0	2.55455	0.514393	3.23412	0	0	2.31422	neutrophilic granule protein
	O77791	0	4.03803	1.29014	2.59592	3.36065	0	2.88657	protein S100-A12
	P07466	0	7.82036	0	9.24265	4.44661	0	3.53136	neutrophil antibiotic peptide NP-5
	P16973	0	7.17555	0	2.48971	5.2001	0	3.81363	lysozyme C
	P01377	0	0	2.18627	0	0	0	0	corticostatin-4
	P01840	0	0	0	1.37229	0.750436	3.66764	2.19805	Ig kappa-b4 chain C region
	G1ST17	0	0	0	0.562277	0	0	0	peptidoglycan recognition protein 1
	G1T5Q9	0	0	0	0.611063	0	0	0	bactericidal permeability-increasing protein
	P50117	0	0	0	0	3.89865	0	0	protein S100-A9
	G1THZ6	0	0	0	0	1.17807	0	0	Ig gamma-1 chain C region
	G1SS91	0	0	0	0	0	0	0.0746512	complement C4-A
	G1SXG6	0	0	0	0	0	0	3.53344	protein S100-A8
	G1TPZ1	0	0	0	0	0	0	0.425524	galectin-1
Nuclear Regulation	G1U2Q4	0	5.91775	0.70547	0	0	0	0	histone H2A type 1-E
	G1U155	0	4.42411	0	0	0	0	0	histone H2B type 1-like
	G1SSZ2	0	0	0.700085	5.98337	0	2.64059	4.20459	histone H2A
Protein Export Machinery	P51662	0	1.54911	0.618192	4.16619	0.697674	1.81969	1.93919	annexin A1
	G1TIS5	0	1.54911	0.71306	0	0	1.81969	2.12178	annexin A1
	G1SL62	0	0	1.67011	0	0	0	0	annexin A2
	G1TBL6	0	0	0.128508	0	0	0	0	clathrin heavy chain 1 isoform X2
	G1TDI4	0	0	0	0	0.934149	0	0	transthyretin
Protease Inhibitors	Q07298	0	0.47159	0	0	0	0	0.503555	alpha-1-antiproteinase
	G1SQ70	0	0	0	0	0	0	0.310135	alpha-2-macroglobulin
Fibrinogen	G1TKX3	0	0	0	0.253475	0	0	1.28697	fibrinogen gamma chain
	G1T0X2	0	0	0	0	0	0.339858	0.488722	fibrinogen alpha chain
	G1T0W8	0	0	0	0	0	0	1.35126	fibrinogen beta chain
Keratin	G1SUH8	3.63006	1.60857	0.473407	11.2227	2.49712	2.37986	0.313864	keratin 2
	G1U9I8	3.65509	1.96549	0.711275	2.97108	3.08722	4.25371	0	keratin type II cytoskeletal 1
	G1T1V0	2.34748	0.638021	0.615174	7.01486	1.90905	4.72116	0	keratin type I cytoskeletal 10
	G1TDN6	1.27021	1.38188	0.162399	3.90653	1.57635	0	0	keratin type II cytoskeletal 5
	G1SHY2	1.31726	0	0.182801	0	0	0	0	keratin 75
	G1SHZ4	0	1.25148	0	3.41051	0.744751	1.16814	0	keratin type II cytoskeletal 7
	G1U758	0	0	0.43427	1.88794	0	1.10379	0	keratin type I cytoskeletal 18
	G1T1Y7	0	0	0	2.10274	0	0	0	keratin type I cytoskeletal 14 isoform X1
Extracellular Matrix	G1T4A5	0	0.21726	0.0835456	0.588492	0	1.13778	0.461368	collagen alpha-1(I) chain-like
	G1T2Z5	0	0	0	0.0812086	0	0.20726	0	collagen alpha-2(I) chain (continued)
Hemoglobin/ RBC	P02057	7.63054	3.05834	1.12769	4.01087	7.32476	14.1008	20.6805	hemoglobin subunit beta
	P01948	0	4.74904	0	5.14338	9.10099	33.8774	17.9573	hemoglobin subunit alpha-1/2
	P00919	0	0	0	0	0	2.23398	0	carbonic anhydrase 2
	P07452	0	0	0	0	0	0	0.673444	carbonic anhydrase 1
Metabolism Energy	G1STN6	0	0	0.245667	0	0	0	0	cytochrome b5 type B
	G1STZ4	0	0	0.550189	0	0	0	0	glucose-6-phosphate 1-dehydrogenase isoform X2
	G1TRQ6	0	0	5.58656	0	0	0	0	prostaglandin-E(2) 9-reductase-like
	G1T765	0	0	0	0	0	0	0.972615	malate dehydrogenase 2
Protein Synthesis Machinery	P68105	0	0	6.08815	0	0	0.743876	0	elongation factor 1-alpha 1 isoform X1
	G1T916	0	0	7.89003	0	0	0	0	eukaryotic translation initiation factor 5A-1
	G1TL06	0	0	1.35462	0	0	0	0	60S ribosomal protein L3
	G1TPZ0	0	0	0.504292	0	0	0	0	hCG1994130-like
	G1SMR7	0	0	0	0	0	0	0.494858	60S ribosomal protein L12
	G1T1F0	0	0	0	0	0	0	0.935522	ribosomal protein S14-like
Protein Modification Machinery	O77622	0	0	0.221279	0	0	0	0	cpn60 chaperonin family
	P15253	0	0	0.157658	0	0	0	0	calreticulin precursor
	P30946	0	0	9.04811	0.392795	0	0	0	heat shock protein HSP 90-alpha
	G1SWK6	0	0	11.6784	0	0	0	0.773009	heat shock protein HSP 90-beta isoform X4
	G1T3Y8	0	0	1.6883	0	0	0	0	60 kDa heat shock protein
	G1T464	0	0	8.41167	0	0	0	0.314162	heat shock protein HSP 90-beta isoform X2
	G1T8Q6	0	0	4.39208	0	0	0	0	heat shock protein HSP 90-beta isoform X1
	G1T9M9	0	0	0.550668	0	0	1.46563	0	heat shock cognate 71 kDa protein
	G1U9S7	0	0	0.0508241	0	0	0	0	T-complex protein 1 subunit alpha
	G1U9T1	0	0	0.460784	0	0	0	0	T-complex protein 1 subunit eta
	G1U7L4	0	1.04249	0	0	0.600964	0	1.4091	78 kDa glucose-regulated protein
Transcription Machinery	O19049	0	0	0.641972	0	0	0	0	heterogeneous nuclear ribonucleoprotein K isoform X3
	G1TWL0	0	0	0.102579	0	0	0	0	heterogeneous nuclear ribonucleoproteins A2/B1 isoform X4
Metabolism, nucleotide	G1TJC7	0	0	1.21094	0	0	0	0	nucleophosmin 1 isoform
Metabolism, lipid	G1SME6	0	0	4.85447	0	0	0	0	prostaglandin-E(2) 9-reductase-like
Metabolism, carbohydrate	P00883	0	0	1.2837	0	0	0	0	fructose-bisphosphate aldolase A
	P11974-2	0	0	8.64081	0	0	0	0	pyruvate kinase
	G1SGZ6	0	0	0.0846037	0	0	0	0	glicophosphorylase
	U3KN85	0	0	2.06461	0	0	0	0	alpha-enolase
	U3KPE7	0	0	3.48158	0	0	0	0	aldose reductase
Legend:
Column A represents the functional classification of Oryctolagus cuniculus proteins identified in tick saliva.
Column B represents the accession number of identifed protein from Uniprot database.
Column C - I represents the normalized percentage of NSAF values per saliva protein identified from ticks that fed on rabbits for 24, 48, 72, 96, and 120 h, ticks that were engorged but not detached (BD) and ticks that were engorged and detached (SD)
Column J represents the annotation from Uniprot database for each protein.
